# Supplementary material for: Nanoparticles grown from methanesulfonic acid and methylamine: microscopic structures and formation mechanism
Source: Royal Society of Chemistry journal article supplement (doi:10.1039/c7cp06489f), 2017-01-01
Supplement: c7cp06489f1.pdf [file c7cp06489f1.pdf]

1 Supporting Information available for

2 Nanoparticles Grown from Methanesulfonic Acid and  
3 Methylamine: Microscopic Structures and Formation  
4 Mechanism

5  
6 *Jing Xu<sup>a</sup>, Barbara J. Finlayson-Pitts<sup>a</sup> and R. Benny Gerber<sup>\*,a,b</sup>*

7  
8 <sup>a</sup>Department of Chemistry  
9 University of California, Irvine  
10 Irvine, CA 92697  
11

12 <sup>b</sup>Institute of Chemistry, Fritz Haber Research Center  
13 Hebrew University of Jerusalem  
14 Jerusalem 91904, Israel  
15

16 For submission to:

17 *Physical Chemistry Chemical Physics*  
18  
19  
20

21 \*Corresponding author, R. Benny Gerber Email: [benny@fh.huji.ac.il](mailto:benny@fh.huji.ac.il); phone: (949) 824-6758  
22  
23  
24  
25  
26

28 Table S1. Parameters of the unit cell of the MSA-NH<sub>3</sub> crystal obtained in this work and  
29 corresponding experimental values.

| Parameter | This work | Exp. <sup>105</sup> |
|-----------|-----------|---------------------|
| a (Å)     | 7.729     | 7.499               |
| b (Å)     | 7.312     | 7.288               |
| c (Å)     | 9.371     | 9.234               |
| $\alpha$  | 90.0      | 90.0                |
| $\beta$   | 93.8      | 93.3                |
| $\gamma$  | 90.0      | 90.0                |

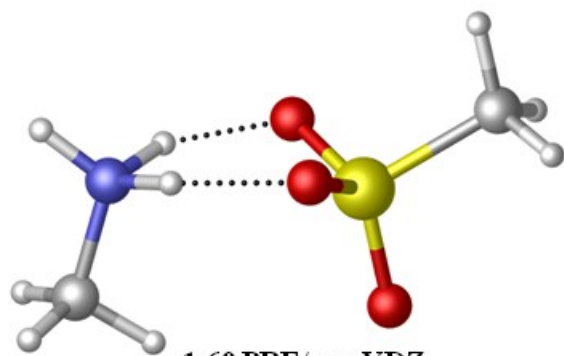

**1.69 PBE/cc-pVDZ**  
**1.68 B3LYP-D3/aug-cc-pVDZ**  
**1.65 MP2/aug-cc-pVDZ**  
**1.72 PM3**

31

32 Figure S1. The structure of MSA-MA and the average bond lengths of H-bonds (Å) at four  
33 methods. The values at B3LYP-D3/aug-cc-pVDZ and MP2/aug-cc-pVDZ are from ref 54.

35

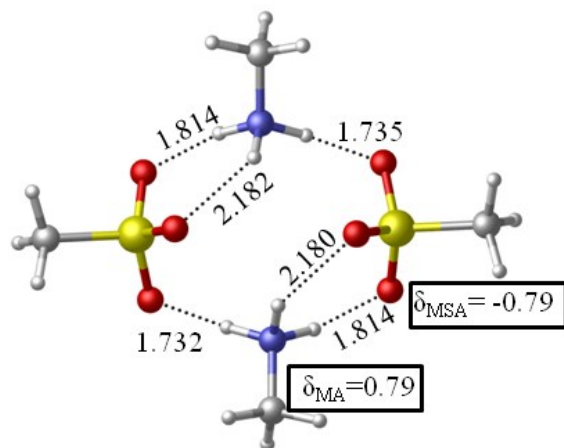

36

37 Figure S2. Key geometrical parameters (Å) and partial charges  $\delta$  (in atomic units) of (MSA-  
38 MA)<sub>2</sub> at PBE/cc-pVDZ level.

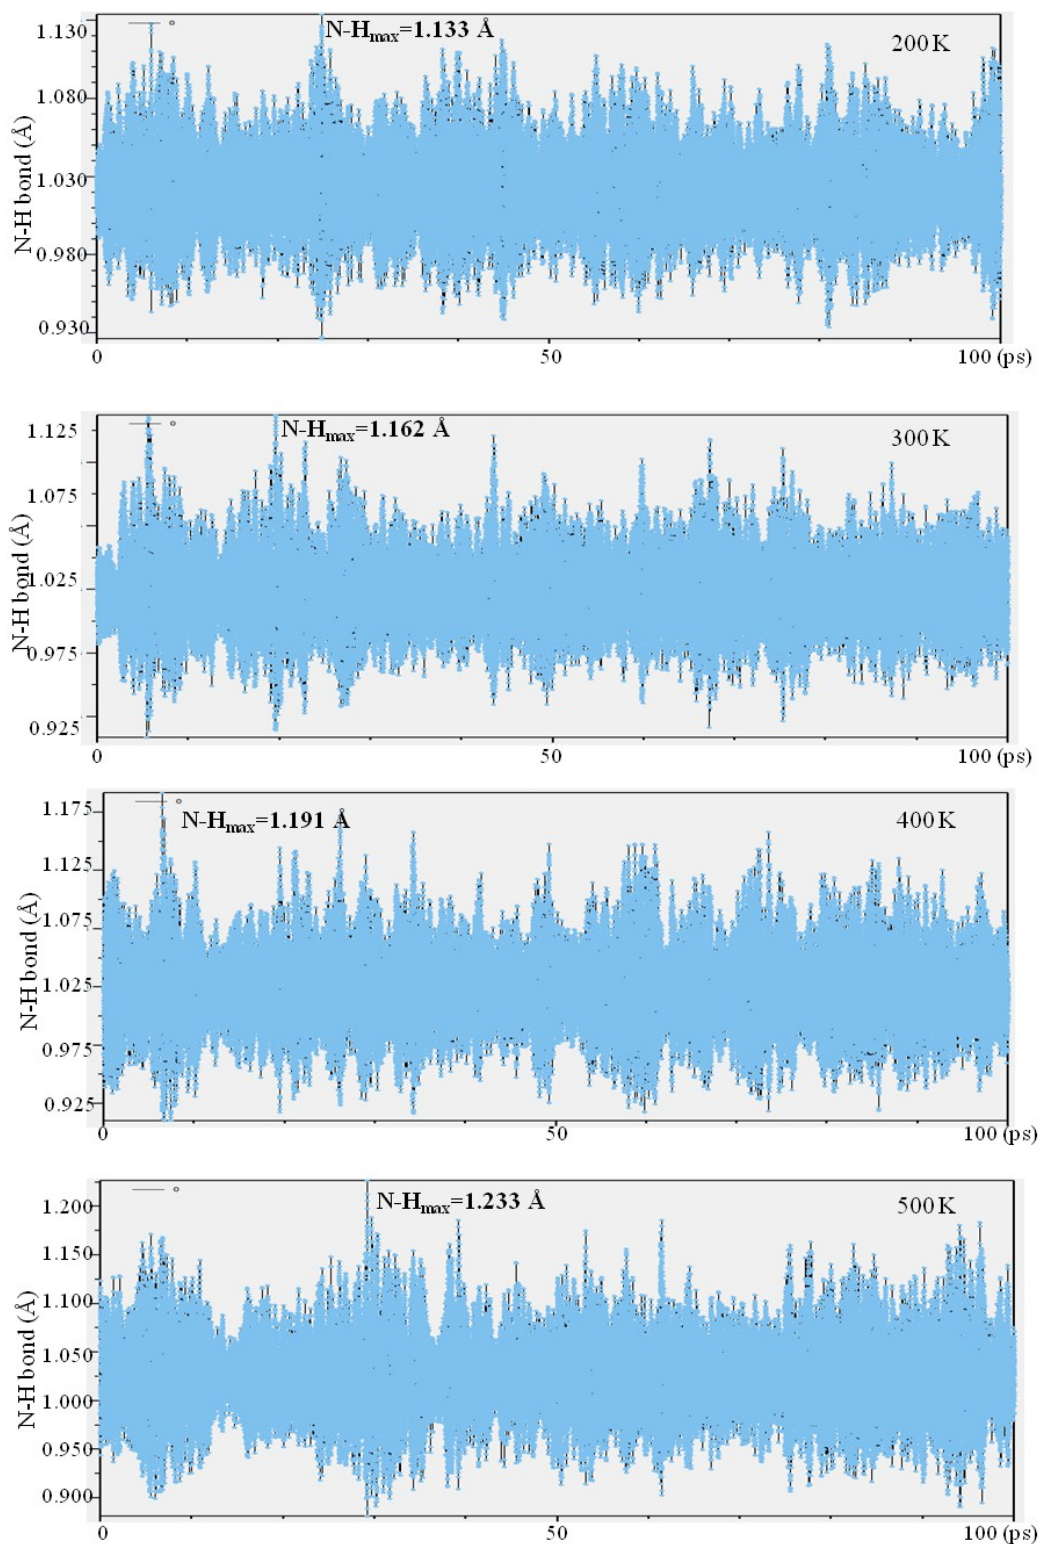

40

41 Figure S3 Bond lengths (Å) of one N-H bond in (MSA-MA)<sub>4</sub> from dynamics simulation at four  
 42 temperatures (200 K, 300 K, 400 K and 500 K) during 100 ps.

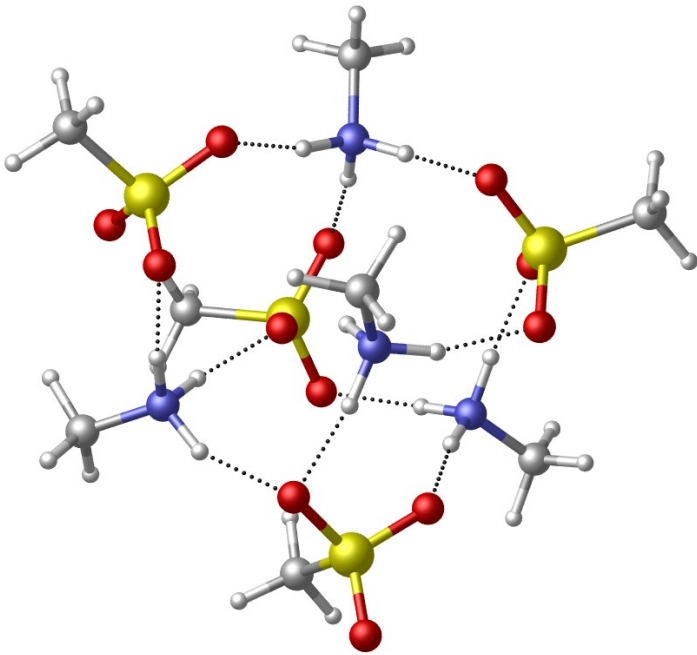

43

44 Figure S4. The structure of the second 4MSA-4MA isomer at PBE/cc-pVDZ level.

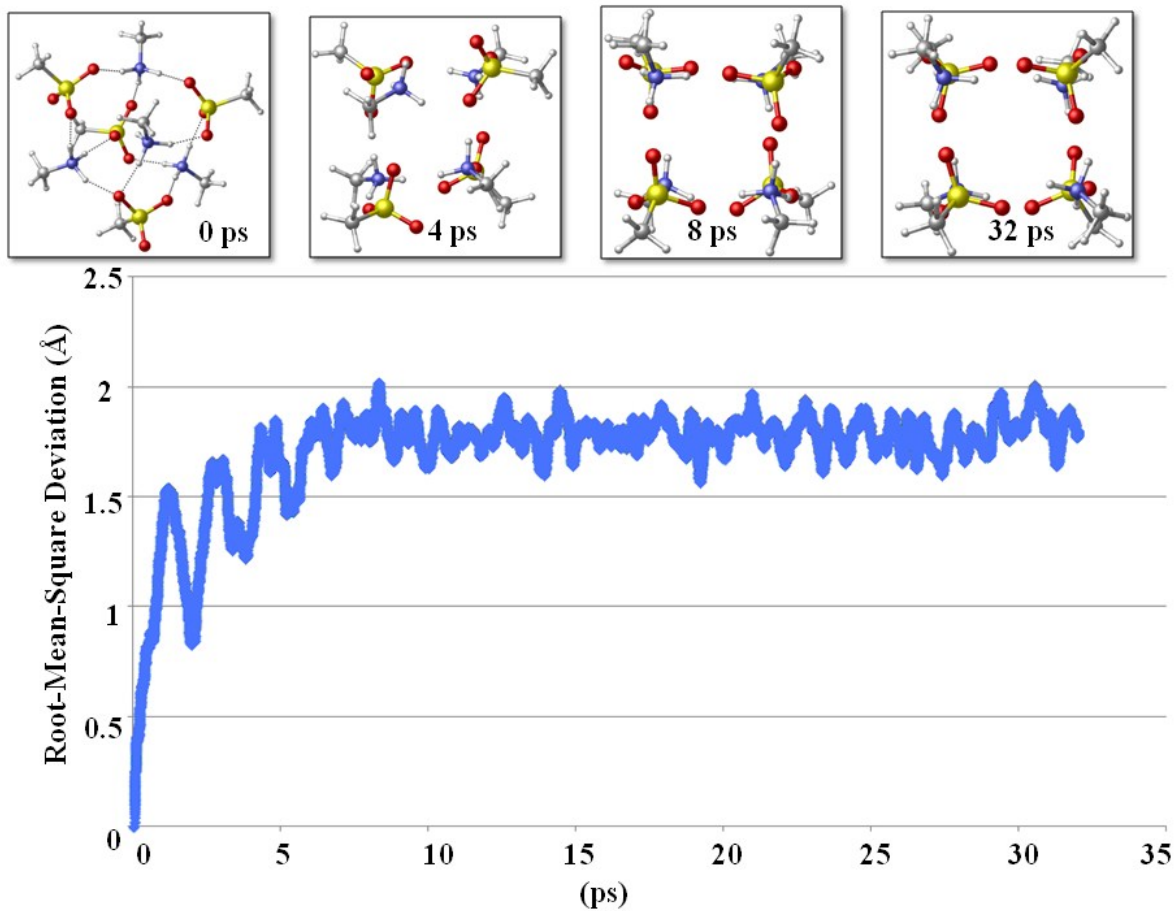

46

47 Figure S5 The structural evolutions of the second isomer of 4MSA-4MA described by Root-  
48 Mean-Square Deviation during 32 ps at 300 K.
